# Supplementary material for: Reactions of the simple nitroalkanes with hydroxide ion in water. Evidence for a complex mechanism
Source: Royal Society of Chemistry journal article supplement (doi:10.1039/c1ob05270e), 2011-01-01
Supplement: c1ob05270e.pdf [file c1ob05270e.pdf]

## Electronic Supplementary Information

### Reactions of the Simple Nitroalkanes with Hydroxide Ion in Water.

#### Evidence for a Complex Mechanism

Zhao Li<sup>a,b</sup>, Jin-Pei Cheng<sup>\*b</sup> and Vernon D. Parker<sup>\*a</sup>

<sup>a</sup>Department of Chemistry and Biochemistry, Utah State University, Logan, UT 84322-0300, <sup>b</sup>Department of Chemistry, The State Key Laboratory of Elemento-Organic Chemistry, Nankai University, Tianjin 300071, China

|                                                                                                                                                                                             |   |
|---------------------------------------------------------------------------------------------------------------------------------------------------------------------------------------------|---|
| Table of Contents .....                                                                                                                                                                     | 1 |
| Table S1. Apparent rate constants and standard deviations for 3 sets of experiments on the reaction of NM (0.10 mM) with NaOH (20.0 mM) in H <sub>2</sub> O at 298 K. ....                  | 3 |
| Table S2. Apparent rate constants and standard deviations for 4 sets of experiments on the reaction of NE (0.10 mM) with NaOH (50.0 mM) in H <sub>2</sub> O at 298 K. ....                  | 4 |
| Table S3. Apparent rate constants and standard deviations for 3 sets of experiments on the reaction of 2-NP (0.10 mM) with NaOH (50.0 mM) in H <sub>2</sub> O at 298 K. ....                | 5 |
| Figure S1. Apparent KIE for the reactions of NM and NM-d <sub>3</sub> in H <sub>2</sub> O at 298K as a function of degree of conversion. ....                                               | 6 |
| Figure S2. Apparent KIE for the reactions of NE and NE-d <sub>2</sub> in H <sub>2</sub> O at 298K as a function of degree of conversion. ....                                               | 6 |
| Figure S3. Apparent KIE for the reactions of 2-NP and 2-NP-d <sub>1</sub> in H <sub>2</sub> O at 298K as a function of degree of conversion. ....                                           | 7 |
| Figure S4. UV absorption spectra for the reactions of NM (a, a'), NE (b, b'), 2-NP (c, c') with OH <sup>-</sup> in H <sub>2</sub> O at 298K. ....                                           | 8 |
| Figure S5. Absorbance – time profile at the isosbestic point near 269.6 nm for the reaction of NE (21.1 mM) with hydroxide ion (50.0 mM) in H <sub>2</sub> O at 298K. ....                  | 9 |
| Figure S6. Absorbance – time profile at the isosbestic point near 267.5 nm for the reaction of NE-d <sub>2</sub> (20.37 mM) with hydroxide ion (100.0 mM) in H <sub>2</sub> O at 298K. .... | 9 |

**Figure S7. Absorbance – time profile at the isosbestic point near 269.8 nm for the reaction of 2-NP (40.6 mM) with hydroxide ion (100.0 mM) in H<sub>2</sub>O at 298K. ....10**

**Figure S8. Absorbance – time profile at the isosbestic point near 269.4 nm for the reaction of 2-NP-d<sub>1</sub> (19.5 mM) with hydroxide ion (100.0 mM) in H<sub>2</sub>O at 298K. ....10**

**Figure S9. Apparent KIE for the reactions of NM and NM-d<sub>3</sub> in H<sub>2</sub>O at 298K as a function of reaction time. ....11**

**Figure S10. Apparent KIE for the reactions of NE and NE-d<sub>2</sub> in H<sub>2</sub>O at 298K as a function of reaction time.....11**

**Figure S11. Apparent KIE for the reactions of 2-NP and 2-NP-d<sub>1</sub> in H<sub>2</sub>O at 298K as a function of reaction time.....12**

**Table S1. Apparent rate constants and standard deviations for 3 sets of experiments on the reaction of NM (0.10 mM) with NaOH (20.0 mM) in H<sub>2</sub>O at 298 K.**

| time/s | Set 1 <sup>a</sup> |       | Set 2 <sup>b</sup> |       | Set 3 <sup>c</sup> |       | Segment |
|--------|--------------------|-------|--------------------|-------|--------------------|-------|---------|
|        | $k_{app}/s^{-1}$   | SD    | $k_{app}/s^{-1}$   | SD    | $k_{app}/s^{-1}$   | SD    |         |
| 0.009  | 0.550              | 0.083 | 0.394              | 0.119 | 0.489              | 0.128 | 1       |
| 0.013  | 0.545              | 0.035 | 0.559              | 0.070 | 0.576              | 0.036 | 2       |
| 0.017  | 0.548              | 0.026 | 0.546              | 0.032 | 0.550              | 0.030 | 3       |
| 0.020  | 0.542              | 0.016 | 0.548              | 0.012 | 0.545              | 0.021 | 4       |
| 0.024  | 0.542              | 0.013 | 0.546              | 0.009 | 0.544              | 0.013 | 5       |
| 0.043  | 0.537              | 0.008 | 0.543              | 0.007 | 0.534              | 0.007 | 6       |
| 0.080  | 0.532              | 0.004 | 0.536              | 0.003 | 0.525              | 0.003 | 7       |
| 0.118  | 0.528              | 0.003 | 0.533              | 0.002 | 0.521              | 0.002 | 8       |
| 0.155  | 0.525              | 0.003 | 0.531              | 0.002 | 0.518              | 0.002 | 9       |
| 0.193  | 0.523              | 0.003 | 0.530              | 0.001 | 0.517              | 0.002 | 10      |
| 0.230  | 0.522              | 0.003 | 0.529              | 0.001 | 0.515              | 0.002 | 11      |
| 0.268  | 0.520              | 0.003 | 0.527              | 0.001 | 0.514              | 0.002 | 12      |
| 0.305  | 0.519              | 0.003 | 0.527              | 0.001 | 0.513              | 0.002 | 13      |
| 0.343  | 0.518              | 0.003 | 0.526              | 0.001 | 0.512              | 0.002 | 14      |
| 0.380  | 0.517              | 0.003 | 0.525              | 0.001 | 0.511              | 0.002 | 15      |
| 0.418  | 0.516              | 0.003 | 0.525              | 0.001 | 0.510              | 0.002 | 16      |
| 0.455  | 0.515              | 0.004 | 0.524              | 0.001 | 0.509              | 0.002 | 17      |
| 0.493  | 0.514              | 0.004 | 0.523              | 0.001 | 0.508              | 0.002 | 18      |
| 0.530  | 0.513              | 0.004 | 0.522              | 0.001 | 0.507              | 0.002 | 19      |
| 0.568  | 0.512              | 0.004 | 0.522              | 0.001 | 0.507              | 0.002 | 20      |
| 0.605  | 0.511              | 0.004 | 0.521              | 0.001 | 0.506              | 0.002 | 21      |
| 0.643  | 0.511              | 0.004 | 0.521              | 0.001 | 0.505              | 0.003 | 22      |
| 0.680  | 0.510              | 0.004 | 0.520              | 0.001 | 0.504              | 0.003 | 23      |
| 0.718  | 0.509              | 0.004 | 0.519              | 0.001 | 0.504              | 0.003 | 24      |

<sup>a</sup>Set 1: 20 stopped-flow repetitions.

<sup>b</sup>Set 2: 12 stopped-flow repetitions.

<sup>c</sup>Set 3: 20 stopped-flow repetitions.

**Table S2. Apparent rate constants and standard deviations for 4 sets of experiments on the reaction of NE (0.10 mM) with NaOH (50.0 mM) in H<sub>2</sub>O at 298 K.**

| time/s | Set 1 <sup>a</sup> |       | Set 2 <sup>b</sup> |       | Set 3 <sup>c</sup> |       | Set 4 <sup>d</sup> |       | Segment |
|--------|--------------------|-------|--------------------|-------|--------------------|-------|--------------------|-------|---------|
|        | $k_{app}/s^{-1}$   | SD    | $k_{app}/s^{-1}$   | SD    | $k_{app}/s^{-1}$   | SD    | $k_{app}/s^{-1}$   | SD    |         |
| 0.014  | 0.290              | 0.097 | 0.275              | 0.067 | 0.289              | 0.081 | 0.266              | 0.110 | 1       |
| 0.021  | 0.286              | 0.044 | 0.274              | 0.039 | 0.274              | 0.046 | 0.271              | 0.037 | 2       |
| 0.029  | 0.280              | 0.019 | 0.271              | 0.028 | 0.274              | 0.018 | 0.267              | 0.024 | 3       |
| 0.036  | 0.276              | 0.014 | 0.271              | 0.022 | 0.269              | 0.011 | 0.269              | 0.017 | 4       |
| 0.044  | 0.270              | 0.014 | 0.269              | 0.016 | 0.269              | 0.008 | 0.267              | 0.013 | 5       |
| 0.081  | 0.265              | 0.006 | 0.264              | 0.005 | 0.266              | 0.004 | 0.264              | 0.006 | 6       |
| 0.156  | 0.260              | 0.002 | 0.259              | 0.001 | 0.262              | 0.002 | 0.261              | 0.002 | 7       |
| 0.231  | 0.258              | 0.001 | 0.257              | 0.001 | 0.260              | 0.001 | 0.260              | 0.001 | 8       |
| 0.306  | 0.256              | 0.001 | 0.256              | 0.001 | 0.259              | 0.001 | 0.259              | 0.001 | 9       |
| 0.381  | 0.255              | 0.001 | 0.255              | 0.001 | 0.259              | 0.001 | 0.258              | 0.001 | 10      |
| 0.456  | 0.255              | 0.001 | 0.255              | 0.001 | 0.258              | 0.001 | 0.257              | 0.001 | 11      |
| 0.531  | 0.254              | 0.001 | 0.254              | 0.001 | 0.257              | 0.001 | 0.257              | 0.001 | 12      |
| 0.606  | 0.254              | 0.001 | 0.253              | 0.001 | 0.257              | 0.001 | 0.256              | 0.001 | 13      |
| 0.681  | 0.253              | 0.001 | 0.253              | 0.001 | 0.257              | 0.001 | 0.256              | 0.001 | 14      |
| 0.756  | 0.253              | 0.001 | 0.252              | 0.001 | 0.256              | 0.001 | 0.255              | 0.001 | 15      |
| 0.831  | 0.252              | 0.001 | 0.251              | 0.001 | 0.256              | 0.001 | 0.255              | 0.001 | 16      |
| 0.906  | 0.252              | 0.001 | 0.251              | 0.001 | 0.255              | 0.001 | 0.255              | 0.001 | 17      |
| 0.981  | 0.251              | 0.001 | 0.250              | 0.001 | 0.255              | 0.001 | 0.254              | 0.001 | 18      |
| 1.056  | 0.251              | 0.001 | 0.249              | 0.001 | 0.255              | 0.001 | 0.254              | 0.001 | 19      |
| 1.131  | 0.251              | 0.001 | 0.248              | 0.001 | 0.254              | 0.001 | 0.254              | 0.001 | 20      |
| 1.206  | 0.250              | 0.001 | 0.248              | 0.001 | 0.254              | 0.001 | 0.254              | 0.001 | 21      |
| 1.281  | 0.250              | 0.001 | 0.247              | 0.001 | 0.254              | 0.001 | 0.253              | 0.001 | 22      |
| 1.356  | 0.249              | 0.001 | 0.246              | 0.001 | 0.253              | 0.001 | 0.253              | 0.001 | 23      |
| 1.431  | 0.249              | 0.001 | 0.246              | 0.001 | 0.253              | 0.001 | 0.253              | 0.001 | 24      |

<sup>a</sup>Set 1: 20 stopped-flow repetitions.

<sup>b</sup>Set 2: 10 stopped-flow repetitions.

<sup>c</sup>Set 3: 20 stopped-flow repetitions.

<sup>d</sup>Set 4: 20 stopped-flow repetitions.

**Table S3. Apparent rate constants and standard deviations for 3 sets of experiments on the reaction of 2-NP (0.10 mM) with NaOH (50.0 mM) in H<sub>2</sub>O at 298 K.**

| time/s | Set 1 <sup>a</sup> |        | Set 2 <sup>b</sup> |        | Set 3 <sup>c</sup> |        | Segment |
|--------|--------------------|--------|--------------------|--------|--------------------|--------|---------|
|        | $k_{app}/s^{-1}$   | SD     | $k_{app}/s^{-1}$   | SD     | $k_{app}/s^{-1}$   | SD     |         |
| 0.135  | 0.0248             | 0.0045 | 0.0229             | 0.0081 | 0.0267             | 0.0071 | 1       |
| 0.248  | 0.0221             | 0.0013 | 0.0215             | 0.0023 | 0.0233             | 0.0032 | 2       |
| 0.360  | 0.0216             | 0.0012 | 0.0206             | 0.0014 | 0.0219             | 0.0011 | 3       |
| 0.473  | 0.0214             | 0.0008 | 0.0197             | 0.0012 | 0.0218             | 0.0010 | 4       |
| 0.585  | 0.0212             | 0.0006 | 0.0195             | 0.0009 | 0.0212             | 0.0007 | 5       |
| 1.148  | 0.0207             | 0.0002 | 0.0188             | 0.0004 | 0.0204             | 0.0003 | 6       |
| 2.273  | 0.0199             | 0.0002 | 0.0182             | 0.0001 | 0.0197             | 0.0002 | 7       |
| 3.398  | 0.0193             | 0.0002 | 0.0178             | 0.0001 | 0.0192             | 0.0002 | 8       |
| 4.523  | 0.0187             | 0.0002 | 0.0173             | 0.0001 | 0.0188             | 0.0002 | 9       |
| 5.648  | 0.0183             | 0.0002 | 0.0170             | 0.0001 | 0.0184             | 0.0002 | 10      |
| 6.773  | 0.0180             | 0.0002 | 0.0167             | 0.0001 | 0.0181             | 0.0002 | 11      |
| 7.898  | 0.0177             | 0.0002 | 0.0165             | 0.0001 | 0.0179             | 0.0002 | 12      |
| 9.023  | 0.0175             | 0.0002 | 0.0163             | 0.0001 | 0.0177             | 0.0002 | 13      |
| 10.148 | 0.0173             | 0.0002 | 0.0161             | 0.0001 | 0.0175             | 0.0002 | 14      |
| 11.273 | 0.0172             | 0.0002 | 0.0159             | 0.0001 | 0.0174             | 0.0002 | 15      |
| 12.398 | 0.0170             | 0.0002 | 0.0158             | 0.0001 | 0.0172             | 0.0002 | 16      |
| 13.523 | 0.0169             | 0.0002 | 0.0157             | 0.0001 | 0.0171             | 0.0002 | 17      |
| 14.648 | 0.0168             | 0.0002 | 0.0156             | 0.0001 | 0.0171             | 0.0002 | 18      |
| 15.773 | 0.0167             | 0.0002 | 0.0155             | 0.0001 | 0.0170             | 0.0002 | 19      |
| 16.898 | 0.0166             | 0.0002 | 0.0154             | 0.0001 | 0.0169             | 0.0002 | 20      |
| 18.023 | 0.0165             | 0.0002 | 0.0153             | 0.0001 | 0.0169             | 0.0002 | 21      |
| 19.148 | 0.0165             | 0.0002 | 0.0153             | 0.0001 | 0.0168             | 0.0002 | 22      |
| 20.273 | 0.0164             | 0.0002 | 0.0152             | 0.0001 | 0.0167             | 0.0002 | 23      |
| 21.398 | 0.0163             | 0.0002 | 0.0151             | 0.0001 | 0.0167             | 0.0002 | 24      |

<sup>a</sup>Set 1: 15 stopped-flow repetitions.

<sup>b</sup>Set 2: 15 stopped-flow repetitions.

<sup>c</sup>Set 3: 20 stopped-flow repetitions.

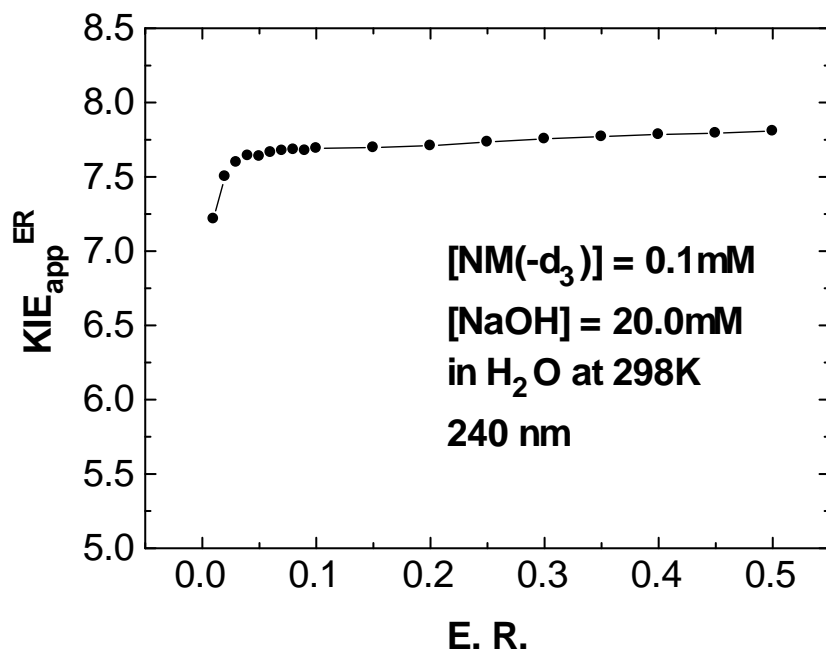

Figure S1. Apparent KIE for the reactions of NM and NM-d<sub>3</sub> in H<sub>2</sub>O at 298K as a function of degree of conversion.

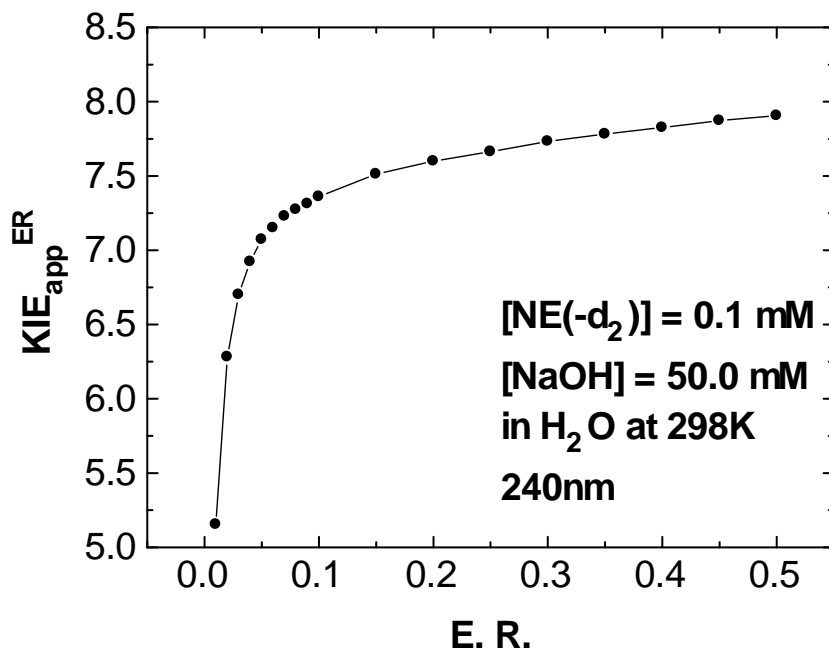

Figure S2. Apparent KIE for the reactions of NE and NE-d<sub>2</sub> in H<sub>2</sub>O at 298K as a function of degree of conversion.

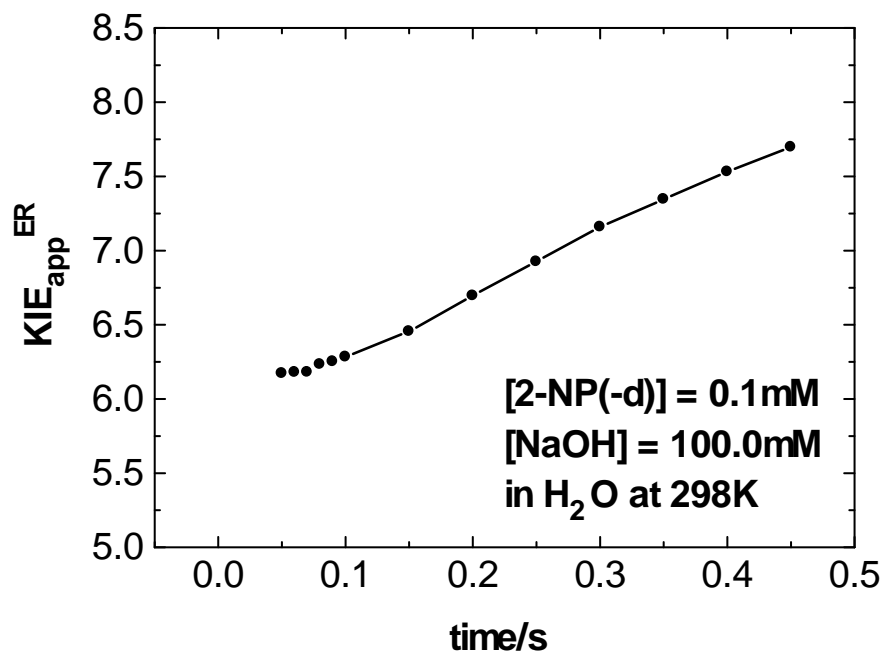

**Figure S3. Apparent KIE for the reactions of 2-NP and 2-NP-d<sub>1</sub> in H<sub>2</sub>O at 298K as a function of degree of conversion.**

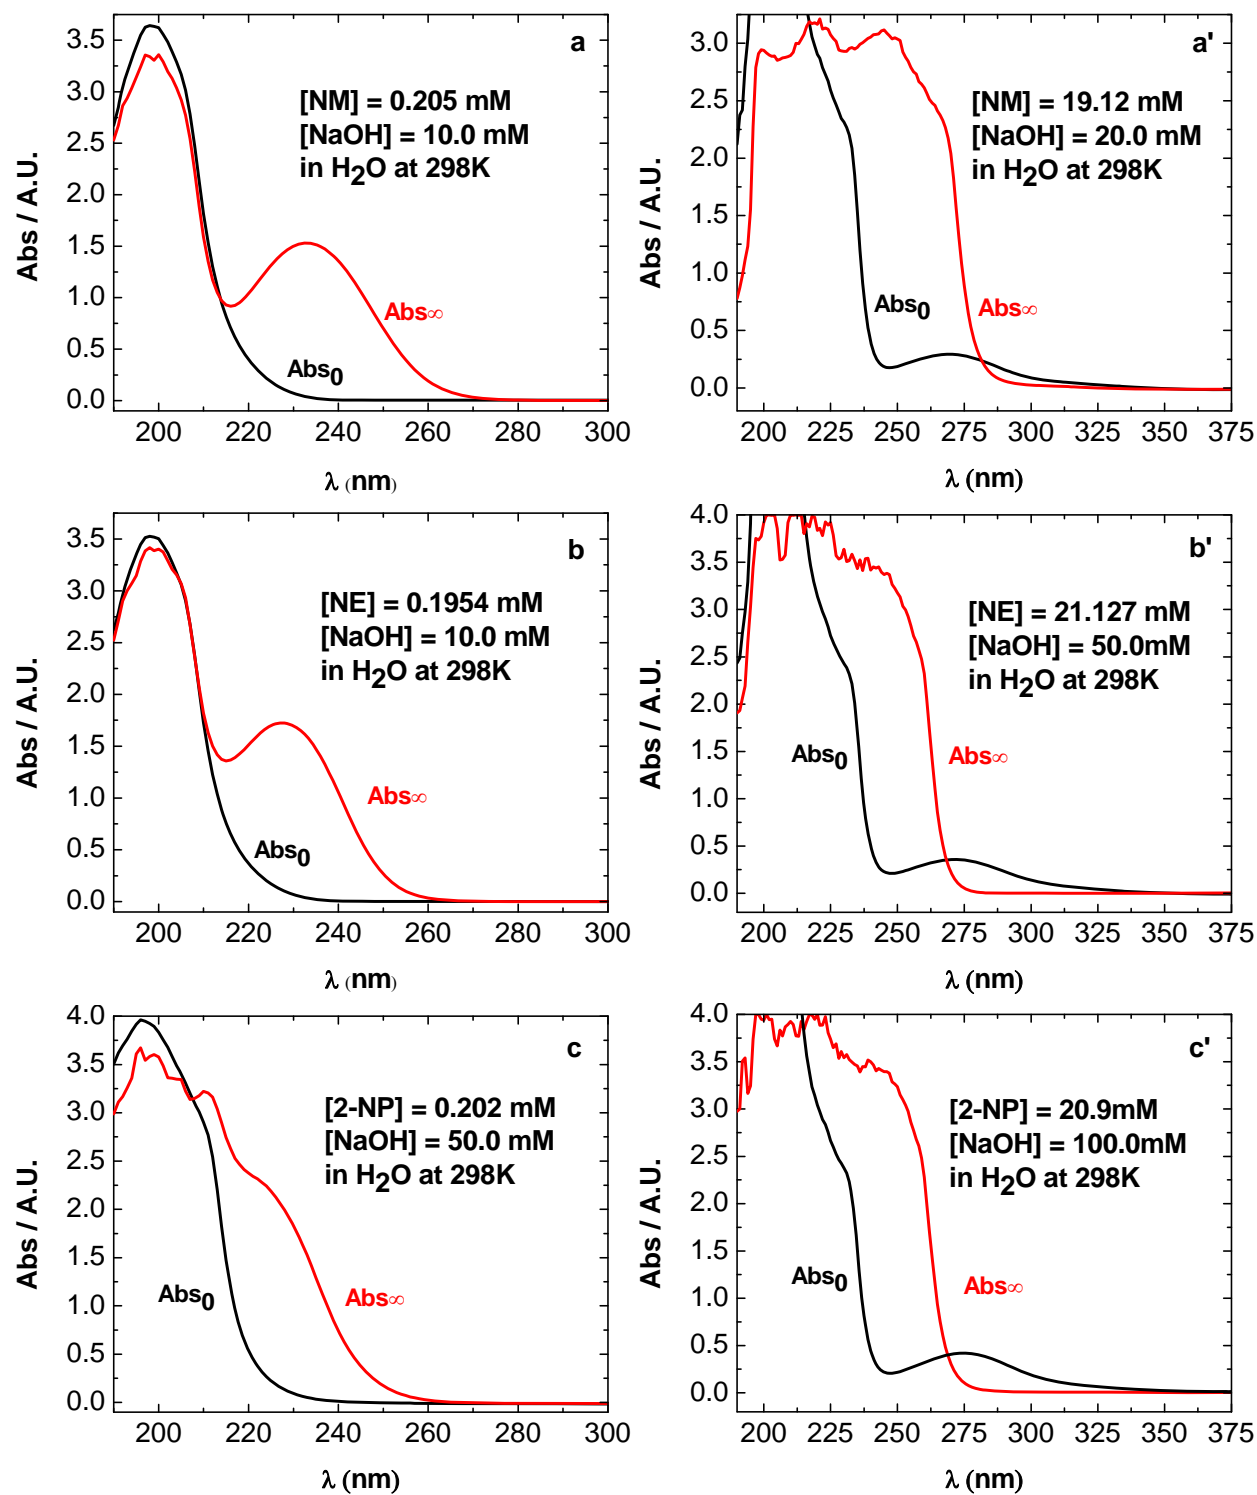

|      | Product Absorption    |                                                       | Reactant Absorption   |                                                       |
|------|-----------------------|-------------------------------------------------------|-----------------------|-------------------------------------------------------|
|      | $\lambda_{\max}$ (nm) | $\epsilon_{\max}$ (M <sup>-1</sup> cm <sup>-1</sup> ) | $\lambda_{\max}$ (nm) | $\epsilon_{\max}$ (M <sup>-1</sup> cm <sup>-1</sup> ) |
| NM   | 234                   | 7310                                                  | 269                   | 15.9                                                  |
| NE   | 229                   | 8347                                                  | 272                   | 17.7                                                  |
| 2-NP | 224                   | 9779                                                  | 275                   | 19.5                                                  |

Figure S4. UV absorption spectra for the reactions of NM (a, a'), NE (b, b'), 2-NP (c, c') with OH<sup>-</sup> in H<sub>2</sub>O under the conditions as shown.



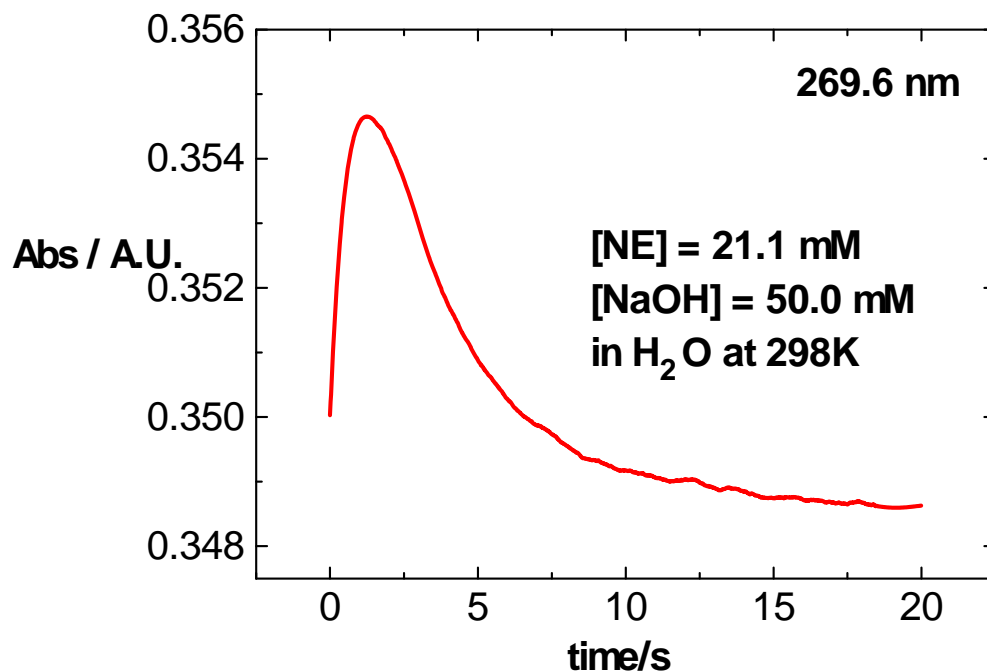

Figure S5. Absorbance – time profile at the isosbestic point near 269.6 nm for the reaction of NE (21.1 mM) with hydroxide ion (50.0 mM) in H<sub>2</sub>O at 298K.

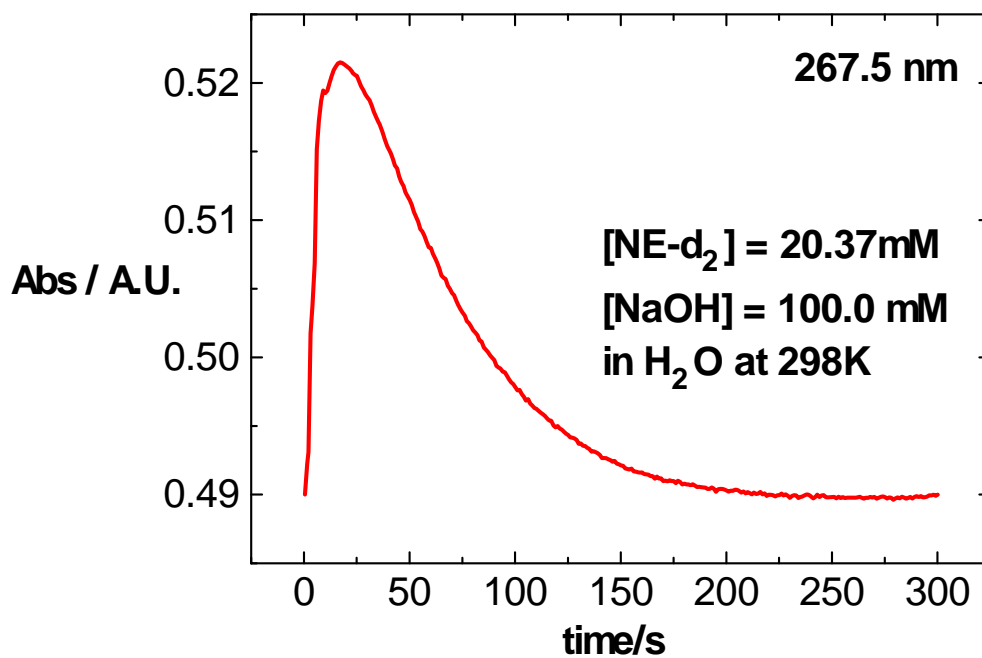

Figure S6. Absorbance – time profile at the isosbestic point near 267.5 nm for the reaction of NE-d<sub>2</sub> (20.37 mM) with hydroxide ion (100.0 mM) in H<sub>2</sub>O at 298K.

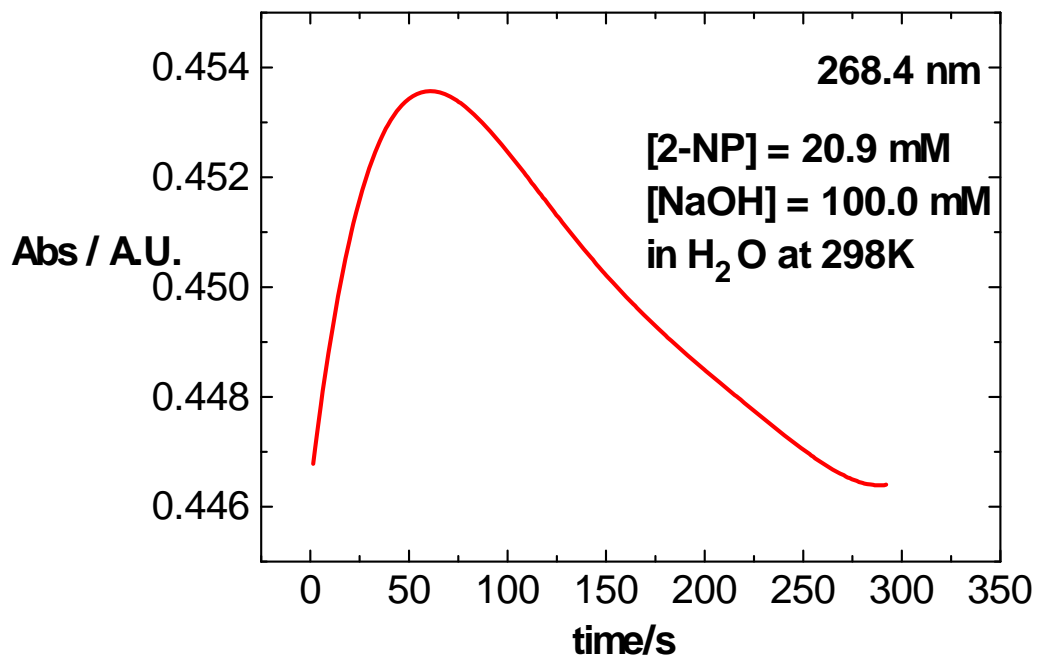

Figure S7. Absorbance – time profile at the isosbestic point near 268.4 nm for the reaction of 2-NP (20.9 mM) with hydroxide ion (100.0 mM) in H<sub>2</sub>O at 298K

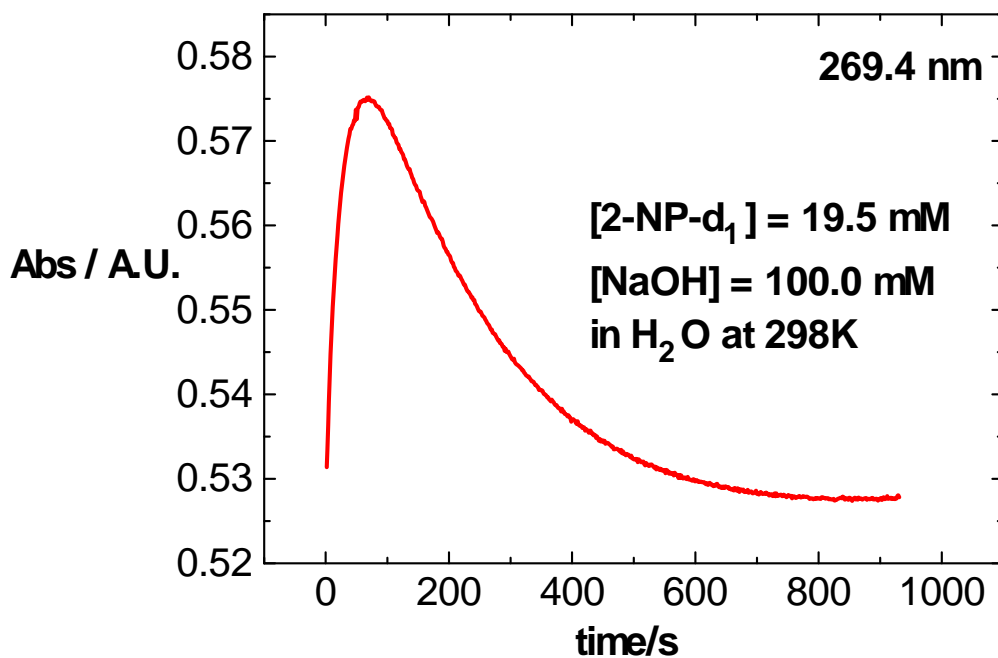

Figure S8. Absorbance – time profile at the isosbestic point near 269.4 nm for the reaction of 2-NP-d<sub>1</sub> (19.5 mM) with hydroxide ion (100.0 mM) in H<sub>2</sub>O at 298K.

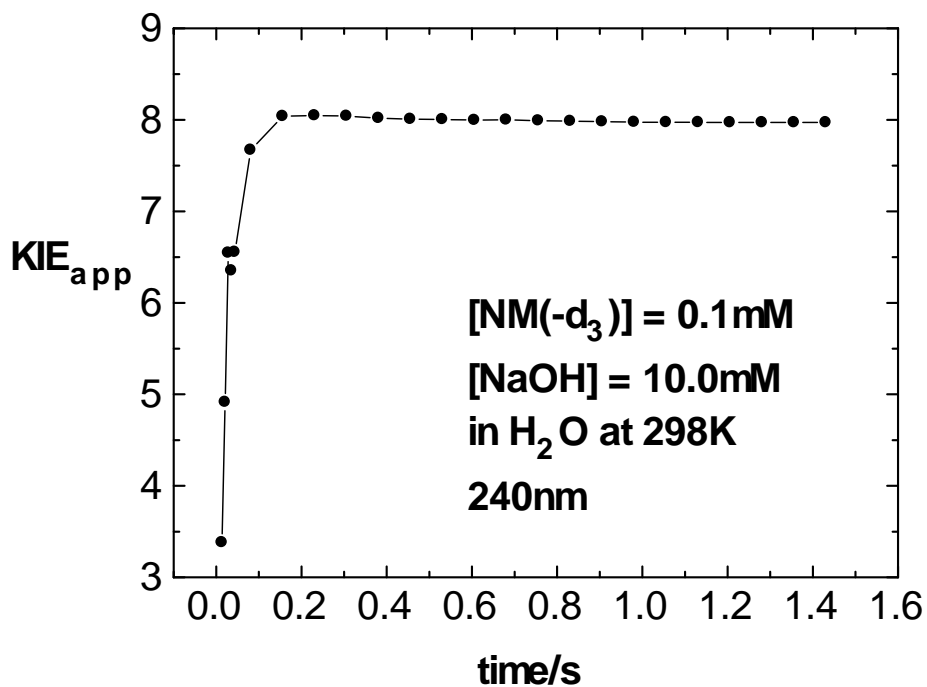

Figure S9. Apparent KIE for the reactions of NM and NM-d<sub>3</sub> in H<sub>2</sub>O at 298K as a function of reaction time.

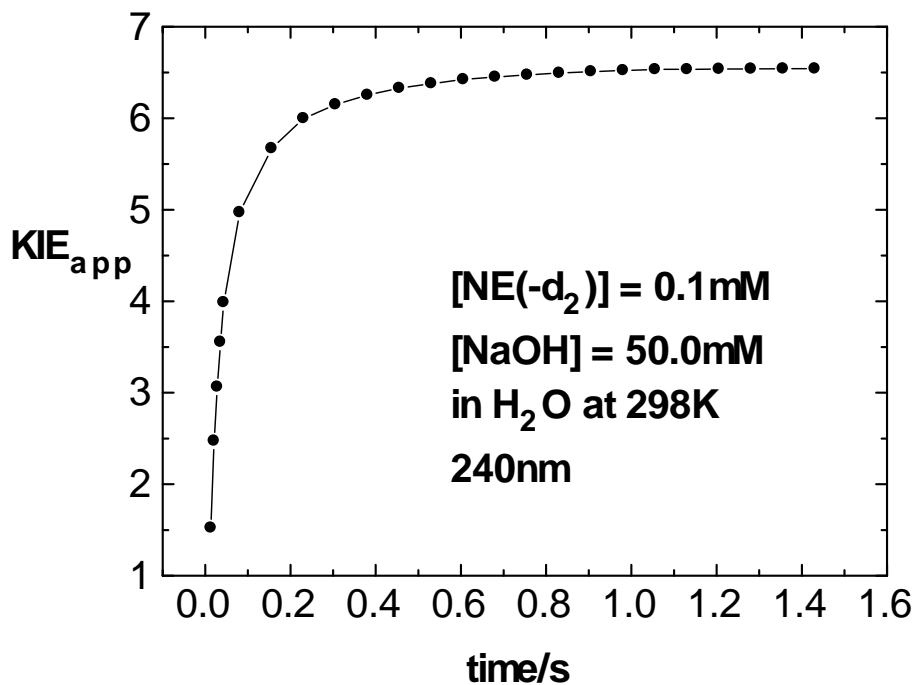

Figure S10. Apparent KIE for the reactions of NE and NE-d<sub>2</sub> in H<sub>2</sub>O at 298K as a function of reaction time.

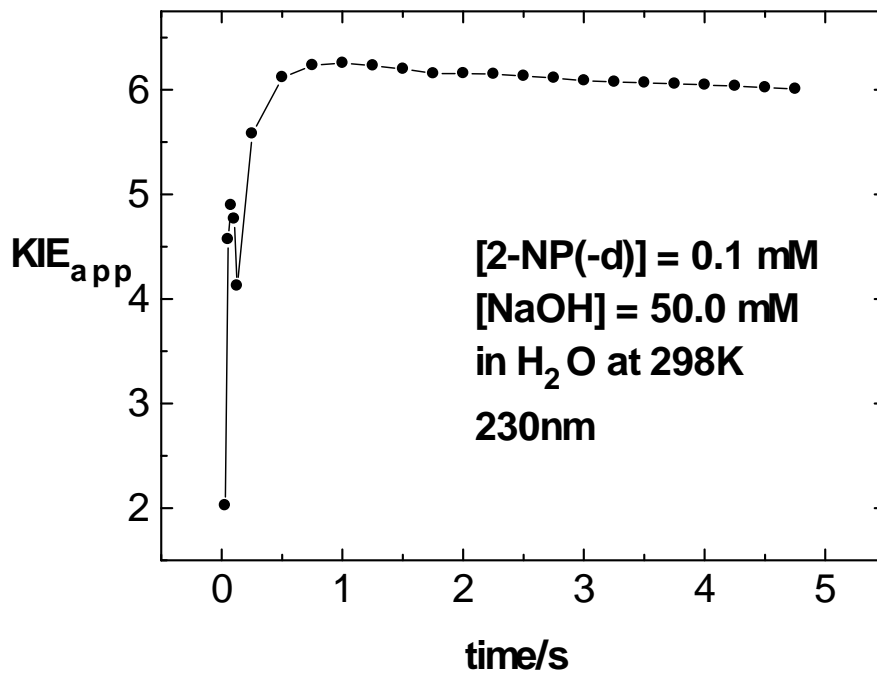

**Figure S11.** Apparent KIE for the reactions of 2-NP and 2-NP-d<sub>1</sub> in H<sub>2</sub>O at 298K as a function of reaction time.
